# Supplementary material for: Genetic dissection of fruit quality traits in the octoploid cultivated strawberry highlights the role of homoeo-QTL in their control
Source: PubMed Central journal article supplement — Theor Appl Genet. 2012 Jan 4;124(6):1059–77. doi: 10.1007/s00122-011-1769-3 (PMC3304055; doi:10.1007/s00122-011-1769-3), 2012-01-04
Supplement: 122_2011_1769_MOESM2_ESM.pdf [file 122_2011_1769_MOESM2_ESM.pdf]

Supplemental material

## **Genetic dissection of fruit quality traits in the octoploid cultivated strawberry highlights the role of homoeo-QTLs in their control**

E. Lerceteau-Köhler<sup>1,3</sup>, A. Moing<sup>2</sup>, G. Guérin<sup>2</sup>, C. Renaud<sup>2</sup>, C. Rothan<sup>2</sup>, B. Denoyes<sup>2\*</sup>

\* Corresponding author:

Béatrice Denoyes

INRA

UMR 1332 Biologie du Fruit et Pathologie

33883, Villenave d'Ornon Cedex

France

Tel: +33 5 57 12 24 60

Fax: +33 5 57 12 24 39

E-mail: [denoyes@bordeaux.inra.fr](mailto:denoyes@bordeaux.inra.fr)

**Online Resource 2:** Significant QTLs detected for 'Capitola' and for 'CF1116' for all the traits based on CIM analysis with  $LOD > LOD$  threshold (2.86 for the female map and 2.90 for the male map). Potential homoeo-QTLs are in boxes and QTL detected in male and female linkage maps are underlined in grey.

Online Resource 2. Significant QTLs detected for 'Capitola' and for 'CF1116' for all the traits based on CIM analysis with LOD>LOD threshold (2.86 for the female map and 2.90 for the male map). Potential homoeo-QTLs are in boxes and QTL detected in male and female linkage maps are underlined in grey.

| Trait <sup>a</sup> | Unique QTLs <sup>b</sup> | Year <sup>c</sup>                                                   | Marker <sup>d</sup> | LG <sup>e</sup>                                                                 | LOD <sup>f</sup> | Mean Effect <sup>g</sup> | R <sup>2h</sup> |                       |
|--------------------|--------------------------|---------------------------------------------------------------------|---------------------|---------------------------------------------------------------------------------|------------------|--------------------------|-----------------|-----------------------|
| <b>Development</b> |                          |                                                                     |                     |                                                                                 |                  |                          |                 |                       |
| (41, 28)           | FD <sup>3</sup>          | FD_I Ib_m13                                                         | 1&3                 | gttg135-ggat205                                                                 | I Ib-m           | 3.10-4.12                | -1.53           | 0.06-0.08             |
|                    |                          | <span style="border: 1px solid black;">FD_IIIa_m12</span>           | 1&2                 | EMFv016/EMFv004                                                                 | IIIa-m           | 3.51-4.51                | 1.61            | 0.06-0.09             |
|                    |                          | <span style="border: 1px solid black;">FD_IIIc1_m3</span>           | 3                   | UDF004                                                                          | IIIc1-m          | 4.11                     | 1.53            | 0.08                  |
|                    |                          | FD_IVa_m2                                                           | 2                   | EMFvi136                                                                        | IVa-m            | 3.47                     | -2.19           | 0.07                  |
|                    | FL <sup>3</sup>          | <span style="border: 1px solid black;">FL_I Ia_f3</span>            | 3                   | gaac370                                                                         | I Ia-f           | 2.91                     | 1.66            | 0.06                  |
|                    |                          | <span style="border: 1px solid black;">FL_I Ic_m123</span>          | 1&2&3               | tgta420-tgtc201                                                                 | I Ic-m           | 3.61-4.21                | -3.05           | 0.07-0.10             |
|                    |                          | <span style="border: 1px solid black;">FL_IIIa_m1</span>            | 1                   | BFACT036                                                                        | IIIa-m           | 3.38                     | -2.87           | 0.06                  |
|                    |                          | <span style="border: 1px solid black;">FL_III d_m1</span>           | 1                   | BFACT026                                                                        | III d-m          | 3.64                     | -3.05           | 0.07                  |
|                    |                          | FL_IVd_f1                                                           | 1                   | gtgx440                                                                         | IVd2-f           | 4.53                     | -3.84           | 0.11                  |
|                    |                          | FL_Vb_f3                                                            | 3                   | tcaa166                                                                         | Vb-f             | 3.33                     | 1.91            | 0.08                  |
|                    |                          | FL_VIb_m1                                                           | 1                   | tgaa195                                                                         | VIb-m            | 3.05                     | 2.84            | 0.06                  |
|                    | FD/FL <sup>3</sup>       | <span style="border: 1px solid black;">FD/FL_IIIa_m123 / f23</span> | 1&2&3 / 2&3         | <span style="border: 1px solid black;">gata165-BFACT048 / UDF001-gtat374</span> | IIIa-m / f       | 3.58-8.06 / 4.14-4.20    | -0.14 / -0.1    | 0.07-0.14 / 0.09-0.11 |
|                    |                          | <span style="border: 1px solid black;">FD/FL_III d_m12</span>       | 1&2                 | EMFv004-tgac108                                                                 | III d-m          | 3.09-3.97                | -0.09           | 0.05-0.07             |
|                    |                          | <span style="border: 1px solid black;">FD/FL_Va_m12</span>          | 1&2                 | UDF003-gatc168                                                                  | Va-m             | 3.99-4.39                | 0.09            | 0.06-0.07             |
|                    |                          | <span style="border: 1px solid black;">FD/FL_Vb_m2</span>           | 2                   | UDF009                                                                          | Vb-m             | 3.60                     | -0.08           | 0.06                  |
|                    |                          | FD/FL_VIa_m12                                                       | 1&2                 | gata170-ccta102                                                                 | VIa-m            | 3.81-3.03                | -0.08           | 0.05-0.06             |
|                    | DW <sup>2</sup>          | DW_IIIa_f2                                                          | 2                   | tcaa312                                                                         | IIIa-f           | 3.67                     | -0.90           | 0.12                  |
|                    |                          | DW_VIa_m1                                                           | 1                   | tggt320                                                                         | VIa-m            | 3.61                     | 1.31            | 0.12                  |
|                    |                          | DW_VIIb_m1                                                          | 1                   | EMFvi175                                                                        | VIIb-m           | 3.14                     | -0.27           | 0.11                  |
|                    | FW <sup>3</sup>          | FW_Ia_f1                                                            | 1                   | tcaa370                                                                         | Ia-f             | 3.61                     | 2.28            | 0.08                  |
|                    |                          | <span style="border: 1px solid black;">FW_I Ib_m13</span>           | 1&3                 | gttg135-BFACT028                                                                | I Ib-m           | 4.23-5.37                | -1.94           | 0.08-0.10             |
|                    | RD <sup>3</sup>          | <span style="border: 1px solid black;">FW_IIIc1_m3</span>           | 3                   | UDF004                                                                          | IIIc1-m          | 3.78                     | 1.30            | 0.07                  |
|                    |                          | <span style="border: 1px solid black;">RD_I Ib_m3</span>            | 3                   | tgac460                                                                         | I Ib-m           | 5.10                     | -2.75           | 0.11                  |
|                    |                          | <span style="border: 1px solid black;">RD_III d_f1</span>           | 1                   | gtaa268                                                                         | III d-f          | 4.99                     | 4.99            | 0.14                  |
|                    |                          | <span style="border: 1px solid black;">RD_IVc_m1</span>             | 1                   | gaac250                                                                         | IVc-m            | 3.56                     | 4.69            | 0.12                  |
|                    |                          | <span style="border: 1px solid black;">RD_Vc_m2</span>              | 2                   | caaa336                                                                         | Vc-m             | 4.09                     | 4.79            | 0.13                  |
|                    |                          | <span style="border: 1px solid black;">RD_VIb_m3</span>             | 3                   | tcac235                                                                         | VIb-m            | 3.15                     | 2.09            | 0.06                  |
|                    |                          | <span style="border: 1px solid black;">RD_VIIa_m12</span>           | 1&2                 | gatt560                                                                         | VIIa-m           | 3.25-3.77                | -4.06           | 0.08-0.11             |
| <b>Firmness</b>    |                          |                                                                     |                     |                                                                                 |                  |                          |                 |                       |
| (8, 7)             | FIRM <sup>3</sup>        | <span style="border: 1px solid black;">FIRM_I Ib_m3</span>          | 3                   | gttg135                                                                         | I Ib-m           | 3.91                     | -3.10           | 0.07                  |
|                    |                          | <span style="border: 1px solid black;">FIRM_IIIa_m1</span>          | 1                   | gaaa370                                                                         | IIIa-m           | 4.00                     | 2.56            | 0.08                  |
|                    |                          | <span style="border: 1px solid black;">FIRM_IIIb_m2</span>          | 2                   | cctc288                                                                         | IIIb-m           | 3.00                     | -4.90           | 0.10                  |
|                    |                          | <span style="border: 1px solid black;">FIRM_IIIa_f2</span>          | 2                   | UDF001                                                                          | IIIa-f           | 3.11                     | 3.72            | 0.06                  |
|                    |                          | <span style="border: 1px solid black;">FIRM_IIIc_f2</span>          | 2                   | tcag435                                                                         | IIIc-f           | 4.64                     | -4.90           | 0.10                  |
|                    |                          | FIRM_IVa_f1                                                         | 1                   | EMFvi175                                                                        | IVa-f            | 3.48                     | 2.69            | 0.09                  |
|                    |                          | <span style="border: 1px solid black;">FIRM_Vc_m3 / f3</span>       | 3                   | tggt140 / gtta320                                                               | Vc-m / f         | 3.82 / 5.29              | 3.36 / -3.73    | 0.09 / 0.11           |
| <b>Colour</b>      |                          |                                                                     |                     |                                                                                 |                  |                          |                 |                       |
| (29, 19)           | a <sup>3</sup>           | a_Ia_f2                                                             | 2                   | tcac248                                                                         | Ia-f             | 3.03                     | 2.11            | 0.07                  |
|                    |                          | <span style="border: 1px solid black;">a_I Ia_f123</span>           | 1&2&3               | BFACT037-Fvi11                                                                  | I Ia-f           | 3.65-4.03                | -1.94           | 0.08-0.09             |
|                    |                          | <span style="border: 1px solid black;">a_IVd_m1</span>              | 1                   | tgac408                                                                         | IVd-m            | 4.05                     | -3.58           | 0.13                  |
|                    |                          | <span style="border: 1px solid black;">a_Vb_m3</span>               | 3                   | tgat148                                                                         | Vb-m             | 2.99                     | 1.39            | 0.06                  |
|                    |                          | <span style="border: 1px solid black;">a_VIa_m3 / f1</span>         | 3 / 1               | tcaa168 / Fvi020                                                                | VIa-m / f        | 4.88 / 3.19              | 1.79 / -1.64    | 0.07-0.10             |
|                    | b <sup>3</sup>           | <span style="border: 1px solid black;">a_VIb_f2</span>              | 2                   | EMFv010                                                                         | VIb-f            | 3.20                     | 2.13            | 0.07                  |
|                    |                          | <span style="border: 1px solid black;">b_Ia_m3</span>               | 3                   | caaa179                                                                         | Ia-m             | 4.37                     | 0.09            | 0.08                  |
|                    |                          | <span style="border: 1px solid black;">b_IIIa_f3</span>             | 3                   | gtat256**                                                                       | IIIa-f           | 5.02                     | -0.11           | 0.12                  |
|                    |                          | <span style="border: 1px solid black;">b_VIa_m3 / f1</span>         | 3 / 1               | tcaa168 / ccta303                                                               | VIa-m / f        | 3.53 / 3.25              | 0.08 / -1.84    | 0.06-0.07             |
|                    |                          | <span style="border: 1px solid black;">b_VIb_f2</span>              | 2                   | EMFv010                                                                         | VIb-f            | 3.26                     | 2.02            | 0.08                  |
|                    | L <sup>3</sup>           | <span style="border: 1px solid black;">L_I Ia_f3</span>             | 3                   | BFACT037                                                                        | I Ia-f           | 2.90                     | -0.03           | 0.05                  |
|                    |                          | <span style="border: 1px solid black;">L_IIIa_m2 / f23</span>       | 2 / 2&3             | <span style="border: 1px solid black;">gata165 / gtat256</span>                 | IIIa-m / f       | 2.92 / 3.01-4.17         | -1.27 / -0.70   | 0.06 / 0.08-0.11      |

|                             |                   |                   |       |                   |            |                  |              |                  |
|-----------------------------|-------------------|-------------------|-------|-------------------|------------|------------------|--------------|------------------|
|                             |                   | L_IVd_m2          | 2     | tgx104            | IVd-m      | 3.42             | 1.38         | 0.07             |
|                             |                   | L_VIa_m13         | 1&3   | tgta383-gatt255   | VIa-m      | 3.36-3.78        | 0.76         | 0.07             |
|                             | ANTH <sup>2</sup> | ANTH_Ia_f2        | 2     | ccaa280           | Ia-f       | 3.22             | -0.12        | 0.06             |
|                             |                   | ANTH_IIa_f23      | 2&3   | BFACT0026gtgx115  | IIa-f      | 3.03-3.78        | 0.11         | 0.06-0.07        |
|                             |                   | ANTH_IIIa_f3      | 3     | tcta277           | IIIa-f     | 3.56             | -0.11        | 0.08             |
|                             |                   | ANTH_VIa_m23 / f3 | 2 / 3 | gata170 / caag162 | VIa-m / f  | 8.16-9.80 / 4.09 | -1.55        | 0.15-0.17 / 0.08 |
|                             |                   | ANTH_VIb_f2       | 2     | ccaa278           | VIb-f      | 3.84             | -0.13        | 0.07             |
| <b>Sugar related traits</b> |                   |                   |       |                   |            |                  |              |                  |
| (15, 12)                    | SSC <sup>3</sup>  | SSC_IIIa_m2 / f2  | 2     | EMFv004 / gtat256 | IIIa-m / f | 3.52 / 2.91      | 1.01 / -0.68 | 0.09             |
|                             |                   | SSC_Va_f3         | 3     | tcaa355           | Va-f       | 3.84             | 0.57         | 0.08             |
|                             |                   | SSC_VIa_m2 / f3   | 2     | EMFv006 / ccta303 | VIa-m / f  | 2.90 / 4.10      | 0.52 / -0.59 | 0.06 / 0.08      |
|                             | FRU <sup>2</sup>  | FRU_IVb_m1        | 1     | BFCAT008*         | IVb-m      | 3.04             | 2.01         | 0.06             |
|                             |                   | FRU_Vc_f1         | 1     | BFACT005          | Vc-f       | 3.32             | 2.18         | 0.07             |
|                             | GLU <sup>2</sup>  | GLU_Ib_f1         | 1     | tgaa114           | Ib-f       | 3.13             | 2.19         | 0.05             |
|                             |                   | GLU_IIIa_f2       | 2     | UDF001*           | IIIa-f     | 2.98             | -1.96        | 0.08             |
|                             |                   | GLU_IIIc_f1       | 1     | UDF016            | IIIc-f     | 4.47             | 2.56         | 0.07             |
|                             |                   | GLU_IVa_f1        | 1     | gtag267           | IVa-f      | 4.06             | 2.44         | 0.07             |
|                             |                   | GLU_VIa_f1        | 1     | gctg280           | VIa-f      | 3.71             | -2.80        | 0.09             |
|                             | SUCR <sup>2</sup> | SUCR_VIa_m1       | 1     | EMFv006           | VIa-m      | 4.66             | 5.54         | 0.09             |
|                             |                   | SUCR_VIIa_f12     | 1&2   | caat163-BFACT044  | VIIa-f     | 3.93-5.32        | 4.86         | 0.08-0.13        |
| <b>Acid related traits</b>  |                   |                   |       |                   |            |                  |              |                  |
| (22, 21)                    | pH <sup>3</sup>   | pH_Ia_m3          | 3     | caaa179           | Ia-m       | 5.90             | 0.08         | 0.11             |
|                             |                   | pH_IIIb_m2        | 2     | EMFv004           | IIIb-m     | 3.14             | 0.07         | 0.08             |
|                             |                   | pH_IIIc_f2        | 2     | UDF016            | IIIc-f     | 5.32             | 0.08         | 0.10             |
|                             |                   | pH_IVc_f1         | 1     | tcac210*          | IVc-f      | 2.87             | -0.08        | 0.07             |
|                             |                   | pH_Vb_f3          | 3     | tgaa460*          | Vb-f       | 6.38             | 0.08         | 0.13             |
|                             |                   | pH_VIa_f3         | 3     | gtgx540           | VIa-f      | 4.97             | -0.07        | 0.09             |
|                             | TA <sup>3</sup>   | TA_Ia_m3          | 3     | tgaa197           | Ia-m       | 4.51             | -9.04        | 0.09             |
|                             |                   | TA_IIc_m1         | 1     | tgtg270           | IIc-m      | 3.43             | -8.35        | 0.07             |
|                             |                   | TA_IIIc_m2        | 2     | caaa263           | IIIc-m     | 3.36             | 8.23         | 0.07             |
|                             |                   | TA_IVa_f2         | 2     | tgx136            | IVa-f      | 3.32             | -10.87       | 0.07             |
|                             |                   | TA_Vb_m2 / f3     | 2 / 3 | gaaa310 / cttg195 | Vb-m / f   | 3.73 / 5.80      | 0.82         | 0.07 / 0.12      |
|                             | CIT <sup>2</sup>  | CIT_Ia_f1         | 1     | gtgx575           | Ia-f       | 4.81             | -0.79        | 0.10             |
|                             |                   | CIT_IIc_m2        | 2     | tcaa435           | IIc-m      | 3.15             | -0.09        | 0.06             |
|                             |                   | CIT_IIIa_f1       | 1     | ggat355           | IIIa-f     | 3.47             | -0.67        | 0.07             |
|                             |                   | CIT_Vb_f2         | 2     | gaat430           | Vb-f       | 3.23             | -0.59        | 0.09             |
|                             |                   | CIT_VIa_f1        | 1     | gtgx540           | VIa-f      | 3.48             | 0.62         | 0.06             |
|                             |                   | CIT_VIIb_f1       | 1     | caaa154           | VIIb-f     | 4.14             | 0.71         | 0.08             |
|                             | MAL <sup>2</sup>  | MAL_Vd_f2         | 2     | gtat550           | Vd-f       | 2.93             | 0.15         | 0.07             |
|                             |                   | MAL_VIa_m1        | 1     | catc138           | VIa-m      | 5.93             | -0.33        | 0.11             |
|                             |                   | MAL_VIb_m1        | 1     | caag140           | VIb-m      | 3.51             | -0.30        | 0.09             |
|                             |                   | MAL_VIIc_m1       | 1     | EMFv021           | VIIc-m     | 3.94             | -0.27        | 0.07             |

<sup>a</sup>, Traits are the following: Development: FD fruit diameter, FL fruit length, FD/FL ratio, DW dry weight, FW fruit weight, RD ripening date of the fruit. Texture: FIRM fruit firmness. Colour: skin colour parameters a, b and L, ANTH total anthocyanin. Sugar related traits: SSC soluble-solids content, FRU fructose, GLU glucose, SUCR sucrose. Acid related traits : pH, TA titratable acidity, CIT citrate, MAL malate. The numbers indicated in brackets under the traits are the total number QTLs detected and the total number of unique QTL per trait. The number nearby each trait corresponds to the number of years of measurements (2 or 3).

<sup>b</sup>, name of the QTL, which includes the names of the trait, the linkage group, the parental map on which the QTL was detected (male (m) or female (f)) and the year of observation. When QTL were observed several years, the number of year is separated by &. When the QTL was observed on male and female on the same linkage group, the number of year is separated by /.

<sup>c</sup>, year of observation of the QTL.

<sup>d</sup>, The most-closely associated marker locus is indicated. When more than two QTLs (several years of observation) were observed, the interval is given. Distorted markers are noted with asterisks at the end of their name (\*0.01  $\geq$  P  $\geq$  0.001 and \*\*P < 0.001).

<sup>e</sup>, Name of the linkage group according to Rousseau-Gueutin et al. (2008). The Roman number indicates the homoeologous group number. The letter, a, b, c, or d, indicates one of the four homoeologous linkage groups and the final letter, m or f, indicates if the linkage group belongs to the male or the female linkage maps.

<sup>f</sup>, LOD is the log-likelihood at that position. When more than two QTLs were observed the range is given.

<sup>g</sup>, Mean effect (or range of the mean effect when at least two QTLs were merged) on a trait mean value of the presence of one allele at a marker by comparison with the presence of the second allele. + and - indicates the direction of the additive effect. A positive effect means a higher value for 'Capitola' allele on the female map or a higher value for 'CF1116' on the male map.

<sup>h</sup>,  $R^2$  is the percentage of phenotypic variation explained by the QTL. When more than two QTLs were observed the range is given.
